# Supplementary material for: Structural and Social Determinants of Health Factors Associated with County-Level Variation in Non-Adherence to Antihypertensive Medication Treatment
Source: PubMed Central journal article supplement (PMC7557537; doi:10.3390/ijerph17186684), 2020-09-14
Supplement: ijerph-17-06684-s001.pdf [file ijerph-17-06684-s001.pdf]

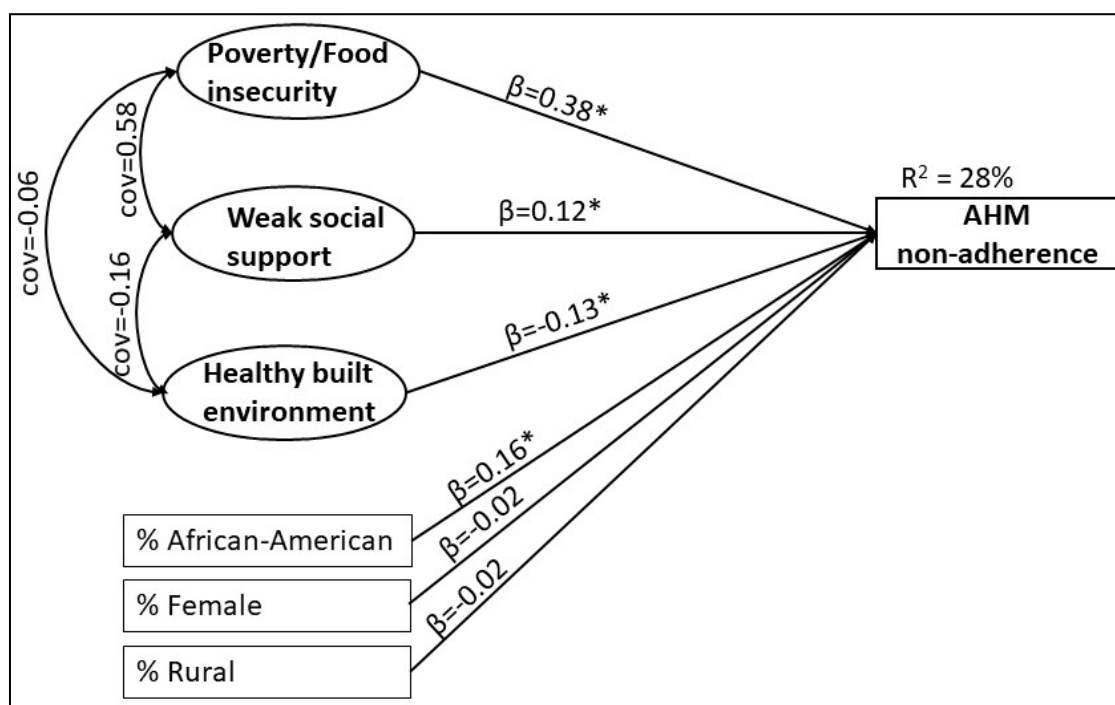

**Figure S1:** Relationships between social determinants of non-adherence and antihypertensive medication non-adherence adjusted for demographic factors. Indicators per construct. Poverty/food insecurity; Percent below poverty line (%), Uninsured (%), Food stamp/SNAP recipient (%), Food insecurity (%). Weak social support; Children in single-parent household (%), Families with female household head (%), Residential segregation, non-white/white (%). Healthy built environment; Population living within half a mile of a park (%).

**Table S1.** Summary statistics of model fit for hypothesized factor measurement and structural equation models.

|                                     | Chi-square | AIC      | NFI  | TLI  | CFI  |
|-------------------------------------|------------|----------|------|------|------|
| Hypothesized CFA measurement models |            |          |      |      |      |
| Model 1                             | 3860.40    | 3924.40  | 0.79 | 0.72 | 0.79 |
| Model 2                             | 2004.33    | 2060.33  | 0.81 | 0.72 | 0.81 |
| Model 3                             | 1969.84    | 2015.84  | 0.81 | 0.73 | 0.81 |
| Hypothesized SEM (unadjusted)       | 2112.77    | 2166.77  | 0.81 | 0.73 | 0.81 |
| Hypothesized SEM (adjusted)         | 10043.44   | 10125.44 | 0.59 | 0.52 | 0.59 |

**Table S2.** Factor loadings of indicator variables for social determinants of non-adherence constructs.

| Constructs                                   | $\beta$ | Standard error | P-value |
|----------------------------------------------|---------|----------------|---------|
| <b>Poverty/food insecurity</b>               |         |                |         |
| *Percent below poverty line (%)              | 0.90    | n/a            | n/a     |
| Uninsured (%)                                | 0.44    | 0.02           | <0.001  |
| Food stamp/SNAP recipient (%)                | 0.90    | 0.02           | <0.001  |
| Food insecurity (%)                          | 0.79    | 0.02           | <0.001  |
| <b>Weak social support</b>                   |         |                |         |
| *Children in single-parent household (%)     | 0.86    | n/a            | n/a     |
| Families with female household head (%)      | 0.80    | 0.02           | <0.001  |
| Residential segregation, non-white/white (%) | 0.23    | 0.03           | <0.001  |

| Constructs                                          | $\beta$ | Standard error | P-value |
|-----------------------------------------------------|---------|----------------|---------|
| <b>Poverty/food insecurity</b>                      |         |                |         |
| <b>Healthy built environment</b>                    |         |                |         |
| *Population living within half a mile of a park (%) | 0.79    | n/a            | n/a     |
| Severe housing problems (%)                         | 0.34    | 0.04           | <0.001  |
| Access to exercise opportunities (%)                | 0.64    | 0.05           | <0.001  |

\*The unstandardized loadings for each marker variable was constrained to a value of 1 to ensure model identification.
